# Supplementary material for: Human serum albumin alters specific genes that can play a role in survival and persistence in Acinetobacter baumannii
Source: PubMed Central journal article supplement (PMC6170387; doi:10.1038/s41598-018-33072-z), 2018-10-03

**Human serum albumin alters specific genes that can play a role in survival and persistence in *Acinetobacter baumannii*.**

Brettni Quinn<sup>1#</sup>, Nyah Rodman<sup>1#</sup>, Eugenio Jara<sup>2</sup>, Jennifer S. Fernandez<sup>1</sup>, Jasmine Martinez<sup>1</sup>, German M. Traglia<sup>3</sup>, Sabrina Montaña<sup>4</sup>, Virginia Cantera<sup>8</sup>, Kori Place<sup>1</sup>, Robert A. Bonomo<sup>5,6,7</sup>, Andres Iriarte<sup>8</sup>, and María Soledad Ramírez<sup>1\*</sup>

<sup>1</sup>Center for Applied Biotechnology Studies, Department of Biological Science, College of Natural Sciences and Mathematics, California State University Fullerton, Fullerton, California, USA, <sup>2</sup>Área Genética, Facultad de Veterinaria, Universidad de la República, Montevideo, Uruguay, <sup>3</sup>Laboratorio de Bacteriología Clínica, Departamento de Bioquímica Clínica, Hospital de Clínicas José de San Martín, Facultad de Farmacia y Bioquímica, Buenos Aires, Argentina, <sup>4</sup>Instituto de Microbiología y Parasitología Médica (IMPAM, UBA-CONICET), Facultad de Medicina, Universidad de Buenos Aires, Argentina, <sup>5</sup>Medical Service and GRECC, Louis Stokes Cleveland Department of Veterans Affairs Medical Center, Cleveland, Ohio, USA, <sup>6</sup>Departments of Medicine, Pharmacology, Molecular Biology and Microbiology, Biochemistry, Proteomics and Bioinformatics, Case Western Reserve University School of Medicine, Cleveland, Ohio, USA, <sup>7</sup>CWRU-Cleveland VAMC Center for Antimicrobial Resistance and Epidemiology (Case VA CARES), Cleveland, Ohio, USA, <sup>8</sup>Laboratorio de Biología Computacional, Dpto. de Desarrollo Biotecnológico, Instituto de Higiene, Facultad de Medicina, UdelaR, Montevideo, Uruguay.

#These authors contributed equally to this work

**Additional Information**

Supplementary information accompanies this paper  
Legends to Supplementary Figure and Tables

**Figure S1. Plot of differential gene expression under HSA treatment.** The  $\log_2$  fold change values of all statistically significantly (FDR adjusted  $P$ -value of  $<0.1$ ) differentially expressed genes identified during transcriptomic analysis of *A. baumannii* strain A118 cells during growth with or without HSA.

**Figure S2. Gene ontology analysis of differentially expressed genes under HSA treatment.** The significantly differentially expressed genes identified during transcriptomic analysis were categorized by their associated gene ontology terms and were placed into one or more of the following categories: cellular component, biological processes and/or molecular function, in an effort to identify their role/function. (A) Within the three main gene ontology categories, up-regulated genes are depicted in dark blue and down regulated genes are depicted in light blue. Furthermore, the number of genes associated with each gene ontology term within the (B) cellular components, (C) biological processes and (D) molecular function categories are depicted as a heat map.

**Table S1** Information about all statistically significantly (FDR  $< 0.1$ ) differentially expressed genes including gene ID, name, function,  $\log_2$  fold change and FDR value. Genes highlighted in green are discussed in detail.

**Table S2** Information about all differentially expressed genes including gene ID, annotation (when available),  $\log_2$  fold change and FDR value.

Log2 Fold change

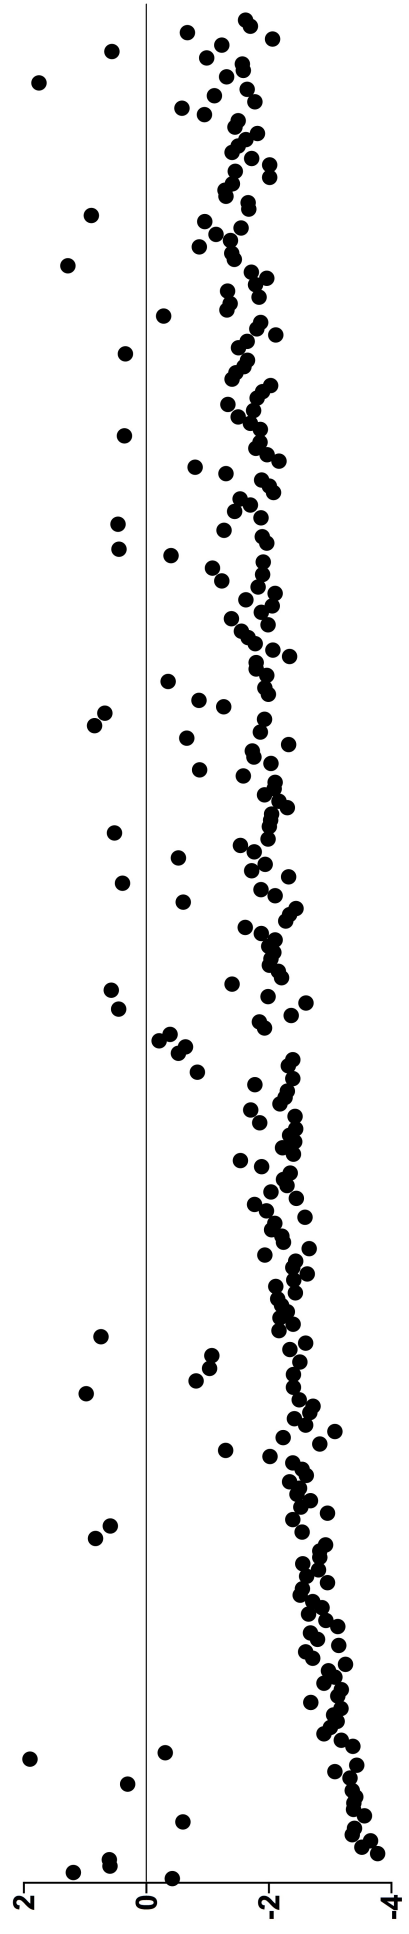

Supplement: 41598_2018_33072_MOESM1_ESM.pdf [file 41598_2018_33072_MOESM1_ESM.pdf]
